# Supplementary material for: Characterization and Expression Analysis of Genes from Megalobrama amblycephala Encoding Hemoglobins with Extracellular Microbicidal Activity
Source: MDPI journal article supplement (doi:10.3390/genes14101972), 2023-10-22
Supplement: s1 [file s1]

**Supplementary Table S1.** Hemoglobin alpha and beta amino acid sequences

used for multiple alignment.

| Subuni | Species Names               | Order         | Family      | Accession      |
|--------|-----------------------------|---------------|-------------|----------------|
| alpha  | <i>Danio rerio</i>          | Cypriniformes | Cyprinidae  | NP_571332.2    |
|        | <i>Ictalurus punctatus</i>  | Siluriformes  | Ictaluridae | NP_001188201.1 |
|        | <i>Salmo salar</i>          | Salmoniformes | Salmonidae  | NP_001117134.1 |
|        | <i>Homo sapiens</i>         | Primates      | Hominidae   | NP_000549.1    |
|        | <i>Ratus norvegicus</i>     | Rodentia      | muridae     | NP_037228.1    |
| beta   | <i>Danio rerio 1</i>        | Cypriniformes | Cyprinidae  | NP_571095.1    |
|        | <i>Salmo salar</i>          | Salmoniformes | Salmonidae  | XP_014042118.1 |
|        | <i>Epinephelus coioides</i> | Perciformes   | Serranidae  | AAK38736.1     |
|        | <i>Homo sapiens</i>         | Primates      | Hominidae   | AAR96398.1     |
|        | <i>Ratus norvegicus</i>     | Rodentia      | muridae     | NP_942071.1    |

**Supplementary Table S2.** *Hemoglobin alpha* subunits cDNA sequences used  
for phylogenetic analysis.

| Species Names                 | Order           | Family        | Accession      |
|-------------------------------|-----------------|---------------|----------------|
| <i>Carassius auratus</i>      | Cypriniformes   | Cyprinidae    | AM933143.1     |
| <i>Danio rerio</i>            | Cypriniformes   | Cyprinidae    | NM_131257.2    |
| <i>Brycon cephalus</i>        | Cypriniformes   | Characidae    | EF153472.1     |
| <i>Oncorhynchus mykiss</i>    | Salmoniformes   | Salmonidae    | NM_001124551.1 |
| <i>Salmo salar</i>            | Salmoniformes   | Salmonidae    | NM_001123662.1 |
| <i>Esox lucius</i>            | Esociformes     | Esocidae      | BT079758.1     |
| <i>Nibea miichthioides</i>    | Perciformes     | Sciaenidae    | DQ150109.1     |
| <i>Pseudosciaena crocea</i>   | Perciformes     | Sciaenidae    | AY803735.2     |
| <i>Sciaenops ocellatus</i>    | Perciformes     | Sciaenidae    | AY940203.1     |
| <i>Seriola quinqueradiata</i> | Perciformes     | Carangidae    | AB034640.1     |
| <i>Pagrus major</i>           | Perciformes     | Sparidae      | AY190679.1     |
| <i>Epinephelus coioides</i>   | Perciformes     | Serranidae    | JN112535.1     |
| <i>Treatomus newnesi</i>      | Perciformes     | Nototheniidae | AY883037.1     |
| <i>Ictalurus punctatus</i>    | Siluriformes    | Ictaluridae   | NM_001201272.1 |
| <i>Anoplopoma fimbria</i>     | Scorpaeniformes | Anoplopomatid | BT082697.1     |
| <i>Thunnus thynnus 1</i>      | Scombriformes   | Scombrida     | AB093569.1     |
| <i>Thunnus thynnus 2</i>      | Scombriformes   | Scombrida     | AB093570.1     |
| <i>Xenopus laevis</i>         | Anura           | Pipidae       | NM_001086328.1 |
| <i>Gallus gallus</i>          | Galliformes     | Phasianidae   | NM_001004376.2 |
| <i>Mus musculus</i>           | Rodentia        | muridae       | NM_008218.2    |
| <i>Ratus norvegicus</i>       | Rodentia        | muridae       | NM_013096.1    |
| <i>Canis lupus</i>            | Carnivora       | Canidae       | NM_001270886.1 |
| <i>Pan troglodytes</i>        | Primates        | Hominidae     | NM_001042627.1 |
| <i>Homo sapiens</i>           | Primates        | Hominidae     | NM_000558.3    |

**Supplementary Table S3.** *Hemoglobin beta* subunits cDNA sequences used for phylogenetic analysis.

| Species Names                       | Order          | Family          | Accession      |
|-------------------------------------|----------------|-----------------|----------------|
| <i>Cyprinus carpio</i>              | Cypriniformes  | Cyprinidae      | XM_019073438.2 |
| <i>Carassius auratus</i>            | Cypriniformes  | Cyprinidae      | AM933144.1     |
| <i>Danio rerio 1</i>                | Cypriniformes  | Cyprinidae      | NM_131020.3    |
| <i>Danio rerio 2</i>                | Cypriniformes  | Cyprinidae      | NM_001005403.1 |
| <i>Hypophthalmichthys</i>           | Cypriniformes  | Cyprinidae      | HM124768.1     |
| <i>Schizopygopsis pylzovi</i>       | Cypriniformes  | Cyprinidae      | KT715803.1     |
| <i>Pimephales promelas</i>          | Cypriniformes  | Cyprinidae      | EF628375.1     |
| <i>Sinocyclocheilus anshuiensis</i> | Cypriniformes  | Cyprinidae      | XM_016478984.1 |
| <i>Sinocyclocheilus grahami</i>     | Cypriniformes  | Cyprinidae      | XM_016275886.1 |
| <i>Paramisgurnus dabryanus</i>      | Cypriniformes  | Cobitidae       | AF528158.1     |
| <i>Salmo salar</i>                  | Salmoniformes  | Salmonidae      | XM_014186643.1 |
| <i>Oncorhynchus mykiss</i>          | Salmoniformes  | Salmonidae      | XM_021625275.2 |
| <i>Oncorhynchus tshawytscha</i>     | Salmoniformes  | Salmonidae      | XM_024390321.2 |
| <i>Pygocentrus nattereri</i>        | Characiformes  | Serrasalminidae | XM_017718993.2 |
| <i>Epinephelus coioides</i>         | Perciformes    | Serranidae      | AY029506.1     |
| <i>Xenopus laevis 1</i>             | Anura          | Pipidae         | NM_001096347.1 |
| <i>Xenopus laevis 2</i>             | Anura          | Pipidae         | NM_001088028.2 |
| <i>Gallus gallus</i>                | Galliformes    | Phasianidae     | NM_205489.3    |
| <i>Equus caballus</i>               | Perissodactyla | Equidae         | NM_001164018.1 |
| <i>Bos taurus</i>                   | Artiodactyla   | Bovidae         | NM_173917.2    |
| <i>Ovis aries</i>                   | Artiodactyla   | Bovidae         | NM_001097648.1 |
| <i>Mus musculus</i>                 | Rodentia       | muridae         | NM_001127686.1 |
| <i>Ratus norvegicus</i>             | Rodentia       | muridae         | NM_198776.1    |
| <i>Pan troglodytes</i>              | Primates       | Hominidae       | XM_508242.5    |
| <i>Homo sapiens</i>                 | Primates       | Hominidae       | AY509193.1     |
